# Supplementary material for: Population antibody responses following COVID-19 vaccination in 212,102 individuals
Source: PubMed Central journal article supplement (PMC8850615; doi:10.1038/s41467-022-28527-x), 2022-02-16
Supplement: 41467_2022_28527_MOESM1_ESM.pdf [file 41467_2022_28527_MOESM1_ESM.pdf]

**Supplementary table 1**

Antibody positivity by age group, unadjusted and adjusted for known test performance, stratified by vaccine type received and number of doses.

**A. ChAdOx1 (AstraZeneca)**

| <b>ChAdOx1 (AstraZeneca): one dose</b> |                 |              |                                 |                                                    |
|----------------------------------------|-----------------|--------------|---------------------------------|----------------------------------------------------|
| <b>Category</b>                        | <b>Positive</b> | <b>Total</b> | <b>Antibody (Ab) positivity</b> | <b>Ab positivity adjusted for test performance</b> |
| 18-24                                  | 283             | 436          | 64.9 [60.3-69.2]                | 68.4 [63.0-73.4]                                   |
| 25-34                                  | 798             | 1338         | 59.6 [57.0-62.2]                | 62.2 [59.1-65.3]                                   |
| 35-44                                  | 1572            | 2962         | 53.1 [51.3-54.9]                | 54.5 [52.4-56.6]                                   |
| 45-54                                  | 4606            | 10006        | 46.0 [45.1-47.0]                | 46.3 [45.2-47.4]                                   |
| 55-64                                  | 16608           | 41907        | 39.6 [39.2-40.1]                | 38.8 [38.3-39.4]                                   |
| 65-74                                  | 1115            | 3115         | 35.8 [34.1-37.5]                | 34.3 [32.4-36.3]                                   |
| 75+                                    | 21              | 84           | 25.0 [17.0-35.2]                | 21.7 [12.3-33.6]                                   |
| <b>Two doses</b>                       |                 |              |                                 |                                                    |
| 18-24                                  | 110             | 121          | 90.9 [84.5-94.8]                | 98.8 [91.2-100.0]                                  |
| 25-34                                  | 298             | 328          | 90.9 [87.2-93.5]                | 98.7 [94.5-100.0]                                  |
| 35-44                                  | 410             | 475          | 86.3 [82.9-89.1]                | 93.4 [89.5-96.7]                                   |
| 45-54                                  | 658             | 820          | 80.2 [77.4-82.8]                | 86.3 [83.0-89.3]                                   |
| 55-64                                  | 4446            | 5703         | 78.0 [76.9-79.0]                | 83.6 [82.4-84.9]                                   |
| 65-74                                  | 15975           | 21082        | 75.8 [75.2-76.3]                | 81.1 [80.4-81.8]                                   |
| 75+                                    | 1767            | 2431         | 72.7 [70.9-74.4]                | 77.5 [75.4-79.5]                                   |

**B. BNT162b2 (Pfizer)**

| <b>BNT162b2 (Pfizer): one dose</b> |                 |              |                                 |                                                    |
|------------------------------------|-----------------|--------------|---------------------------------|----------------------------------------------------|
| <b>Category</b>                    | <b>Positive</b> | <b>Total</b> | <b>Antibody (Ab) positivity</b> | <b>Ab positivity adjusted for test performance</b> |
| 18-24                              | 140             | 153          | 91.5 [86.0-95.0]                | 99.5 [93.1-100.0]                                  |
| 25-34                              | 370             | 426          | 86.9 [83.3-89.7]                | 94.1 [89.9-97.4]                                   |
| 35-44                              | 475             | 593          | 80.1 [76.7-83.1]                | 86.2 [82.2-89.7]                                   |
| 45-54                              | 601             | 893          | 67.3 [64.2-70.3]                | 71.2 [67.5-74.7]                                   |
| 55-64                              | 935             | 1865         | 50.1 [47.9-52.4]                | 51.1 [48.4-53.7]                                   |
| 65-74                              | 226             | 526          | 43.0 [38.8-47.2]                | 42.7 [37.8-47.7]                                   |
| 75+                                | 399             | 1062         | 37.6 [34.7-40.5]                | 36.4 [33.1-39.9]                                   |
| <b>Two doses</b>                   |                 |              |                                 |                                                    |
| 18-24                              | 307             | 317          | 96.8 [94.3-98.3]                | 100.0 [100.0-100.0]                                |
| 25-34                              | 864             | 880          | 98.2 [97.1-98.9]                | 100.0 [100.0-100.0]                                |
| 35-44                              | 1293            | 1333         | 97.0 [95.9-97.8]                | 100.0 [100.0-100.0]                                |
| 45-54                              | 1880            | 1962         | 95.8 [94.8-96.6]                | 100.0 [100.0-100.0]                                |
| 55-64                              | 9001            | 9567         | 94.1 [93.6-94.5]                | 100.0 [100.0-100.0]                                |
| 65-74                              | 14782           | 16058        | 92.1 [91.6-92.5]                | 100.0 [99.6-100.0]                                 |
| 75+                                | 4067            | 4701         | 86.5 [85.5-87.5]                | 93.7 [92.5-94.8]                                   |

**Supplementary table 2**

Characteristics of study population, by reported vaccination type

| Variable                       | Category         | ChAdOx1<br>(AstraZeneca) | BNT162b2<br>(Pfizer) | Moderna      | Don't<br>know | Sum /<br>mean<br>(SD) | Weighted<br>proportions / means<br>(SDs) from full<br>REACT-2 cohort<br>(n=953,088)* |
|--------------------------------|------------------|--------------------------|----------------------|--------------|---------------|-----------------------|--------------------------------------------------------------------------------------|
| <b>All participants</b>        | All participants | 139,067 (100%)           | 71,923 (100%)        | 628 (100%)   | 484 (100%)    | 212,102               | 100%                                                                                 |
| <b>Age</b>                     | Mean (SD)        | 60.96 (10.11)            | 62.88 (13.22)        | 45.97 (6.83) | 65.03 (15.8)  | 61.58 (11.34)         | 52.98 (15.99)                                                                        |
| <b>Sex</b>                     | Female           | 76,361 (54.9%)           | 42,791 (59.5%)       | 339 (54%)    | 247 (51%)     | 119,738               | 56.10%                                                                               |
|                                | Male             | 62,705 (45.1%)           | 29,131 (40.5%)       | 289 (46%)    | 237 (49%)     | 92,362                | 43.90%                                                                               |
| <b>Ethnicity</b>               | Asian            | 3,308 (2.4%)             | 2,400 (3.4%)         | 30 (4.8%)    | 23 (4.8%)     | 5,761                 | 3.50%                                                                                |
|                                | Black            | 1,267 (0.9%)             | 714 (1%)             | 9 (1.4%)     | 7 (1.5%)      | 1,997                 | 0.90%                                                                                |
|                                | Mixed            | 971 (0.7%)               | 493 (0.7%)           | 10 (1.6%)    | 3 (0.6%)      | 1,477                 | 1.20%                                                                                |
|                                | Other            | 1,041 (0.8%)             | 658 (0.9%)           | 8 (1.3%)     | 6 (1.3%)      | 1,713                 | 0.90%                                                                                |
|                                | White            | 131,494 (95.2%)          | 67,147 (94%)         | 570 (90.9%)  | 436 (91.8%)   | 199,647               | 93.60%                                                                               |
| <b>Healthcare worker</b>       | No               | 65,144 (94.7%)           | 20,226 (62.6%)       | 549 (98.4%)  | 147 (85.5%)   | 86,066                | 92%                                                                                  |
|                                | Yes              | 3,610 (5.3%)             | 12,103 (37.4%)       | 9 (1.6%)     | 25 (14.5%)    | 15,747                | 8%                                                                                   |
| <b>Number of comorbidities</b> | None             | 79,211 (57%)             | 34,436 (47.9%)       | 475 (75.6%)  | 225 (46.5%)   | 114,347               | 58.10%                                                                               |
|                                | 1                | 37,923 (27.3%)           | 22,482 (31.3%)       | 108 (17.2%)  | 123 (25.4%)   | 60,636                | 26%                                                                                  |
|                                | 2                | 14,454 (10.4%)           | 9,749 (13.6%)        | 32 (5.1%)    | 76 (15.7%)    | 24,311                | 10.60%                                                                               |
|                                | 3+               | 7,479 (5.4%)             | 5,256 (7.3%)         | 13 (2.1%)    | 60 (12.4%)    | 12,808                | 5.30%                                                                                |

\*Samples are weighted to be representative of the adult England population in terms of age, sex, ethnicity, region and deprivation. Within-category proportions (of categorical variables) and means (of continuous variables) should therefore be representative of the adult England population.

**Supplementary table 3**

Antibody prevalence within study population, by prior infection status.

| Variable                 | Category                 | Prior COVID infection (suspected or confirmed) |       |                     |                                          | No prior COVID infection |        |                     |                                          |
|--------------------------|--------------------------|------------------------------------------------|-------|---------------------|------------------------------------------|--------------------------|--------|---------------------|------------------------------------------|
|                          |                          | LFT Positive                                   | Total | Antibody positivity | Prevalence adjusted for test performance | LFT Positive             | Total  | Antibody positivity | Prevalence adjusted for test performance |
| <b>All participants</b>  | All participants         | 20165                                          | 25428 | 79.3 [78.8-79.8]    | 85.2 [84.6-85.8]                         | 109965                   | 180333 | 61.0 [60.8-61.2]    | 63.8 [63.5-64.0]                         |
| <b>Age group (years)</b> | 18-24                    | 356                                            | 404   | 88.1 [84.6-90.9]    | 95.5 [91.4-98.8]                         | 910                      | 1297   | 70.2 [67.6-72.6]    | 74.5 [71.5-77.4]                         |
|                          | 25-34                    | 934                                            | 1114  | 83.8 [81.6-85.9]    | 90.5 [87.9-92.9]                         | 2550                     | 3753   | 67.9 [66.4-69.4]    | 71.9 [70.2-73.7]                         |
|                          | 35-44                    | 1520                                           | 2080  | 73.1 [71.1-74.9]    | 77.9 [75.7-80.1]                         | 4625                     | 8618   | 53.7 [52.6-54.7]    | 55.2 [54.0-56.5]                         |
|                          | 45-54                    | 2616                                           | 3397  | 77.0 [75.6-78.4]    | 82.5 [80.8-84.2]                         | 8221                     | 15635  | 52.6 [51.8-53.4]    | 54.0 [53.0-54.9]                         |
|                          | 55-64                    | 8988                                           | 11524 | 78.0 [77.2-78.7]    | 83.7 [82.8-84.6]                         | 36791                    | 69990  | 52.6 [52.2-52.9]    | 53.9 [53.5-54.4]                         |
|                          | 65-74                    | 5186                                           | 6069  | 85.5 [84.5-86.3]    | 92.4 [91.3-93.4]                         | 49988                    | 67784  | 73.7 [73.4-74.1]    | 78.7 [78.3-79.1]                         |
|                          | 74+                      | 565                                            | 840   | 67.3 [64.0-70.4]    | 71.1 [67.3-74.7]                         | 6880                     | 13256  | 51.9 [51.1-52.8]    | 53.2 [52.2-54.2]                         |
| <b>Sex</b>               | Female                   | 12156                                          | 15011 | 81.0 [80.3-81.6]    | 87.2 [86.4-87.9]                         | 64762                    | 101227 | 64.0 [63.7-64.3]    | 67.3 [66.9-67.6]                         |
|                          | Male                     | 8008                                           | 10416 | 76.9 [76.1-77.7]    | 82.4 [81.4-83.3]                         | 45202                    | 79105  | 57.1 [56.8-57.5]    | 59.3 [58.9-59.7]                         |
| <b>Ethnicity</b>         | Asian                    | 783                                            | 889   | 88.1 [85.8-90.0]    | 95.5 [92.8-97.8]                         | 3272                     | 4707   | 69.5 [68.2-70.8]    | 73.8 [72.2-75.3]                         |
|                          | Black                    | 288                                            | 333   | 86.5 [82.4-89.7]    | 93.6 [88.8-97.4]                         | 1077                     | 1597   | 67.4 [65.1-69.7]    | 71.3 [68.6-74.0]                         |
|                          | Mixed                    | 182                                            | 235   | 77.4 [71.7-82.3]    | 83.0 [76.3-88.8]                         | 764                      | 1190   | 64.2 [61.4-66.9]    | 67.6 [64.3-70.7]                         |
|                          | Other                    | 229                                            | 263   | 87.1 [82.5-90.6]    | 94.3 [88.9-98.4]                         | 925                      | 1387   | 66.7 [64.2-69.1]    | 70.5 [67.5-73.3]                         |
|                          | White                    | 18529                                          | 23504 | 78.8 [78.3-79.4]    | 84.7 [84.1-85.3]                         | 103193                   | 170208 | 60.6 [60.4-60.9]    | 63.4 [63.1-63.6]                         |
| <b>Adioposity</b>        | Normal weight            | 6227                                           | 7799  | 79.8 [78.9-80.7]    | 85.9 [84.8-86.9]                         | 39141                    | 61825  | 63.3 [62.9-63.7]    | 66.5 [66.1-67.0]                         |
|                          | Obese                    | 4584                                           | 5821  | 78.7 [77.7-79.8]    | 84.6 [83.3-85.8]                         | 20810                    | 35121  | 59.3 [58.7-59.8]    | 61.8 [61.2-62.4]                         |
|                          | Overweight               | 6934                                           | 8685  | 79.8 [79.0-80.7]    | 85.8 [84.8-86.8]                         | 36517                    | 60579  | 60.3 [59.9-60.7]    | 63.0 [62.5-63.4]                         |
|                          | Underweight              | 150                                            | 193   | 77.7 [71.3-83.0]    | 83.4 [75.9-89.6]                         | 1095                     | 1722   | 63.6 [61.3-65.8]    | 66.8 [64.1-69.5]                         |
| <b>Smoking</b>           | Current cigarette smoker | 1184                                           | 1708  | 69.3 [67.1-71.5]    | 73.5 [70.9-76.0]                         | 6473                     | 11987  | 54.0 [53.1-54.9]    | 55.6 [54.6-56.7]                         |

|                                               |                                    |       |       |                    |                    |       |        |                  |                  |
|-----------------------------------------------|------------------------------------|-------|-------|--------------------|--------------------|-------|--------|------------------|------------------|
|                                               | Former cigarette smoker            | 7085  | 8944  | 79.2 [78.4-80.0]   | 85.1 [84.1-86.1]   | 37716 | 61527  | 61.3 [60.9-61.7] | 64.2 [63.7-64.6] |
|                                               | Never cigarette smoker             | 11349 | 14041 | 80.8 [80.2-81.5]   | 87.0 [86.2-87.8]   | 63154 | 102518 | 61.6 [61.3-61.9] | 64.5 [64.2-64.9] |
|                                               | Prefer not to say                  | 483   | 628   | 76.9 [73.5-80.0]   | 82.4 [78.4-86.1]   | 2231  | 3662   | 60.9 [59.3-62.5] | 63.7 [61.9-65.6] |
| <b>Vaccine type</b>                           | ChAdOx1 (AstraZeneca)              | 12695 | 16860 | 75.3 [74.6-75.9]   | 80.5 [79.8-81.3]   | 62050 | 117985 | 52.6 [52.3-52.9] | 54.0 [53.6-54.3] |
|                                               | Don't know                         | 35    | 51    | 68.6 [55.0-79.7]   | 72.7 [56.8-85.7]   | 167   | 408    | 40.9 [36.3-45.8] | 40.3 [34.9-46.0] |
|                                               | mRNA-1273 (Moderna)                | 81    | 98    | 82.7 [74.0-88.9]   | 89.1 [79.0-96.4]   | 392   | 516    | 76.0 [72.1-79.5] | 81.3 [76.8-85.4] |
|                                               | BNT162b2 (Pfizer)                  | 7343  | 8407  | 87.3 [86.6-88.0]   | 94.6 [93.8-95.4]   | 47308 | 61362  | 77.1 [76.8-77.4] | 82.6 [82.2-83.0] |
| <b>Number of vaccine doses reported</b>       | One dose                           | 8704  | 12640 | 68.9 [68.0-69.7]   | 73.0 [72.1-73.9]   | 24461 | 71285  | 34.3 [34.0-34.7] | 32.6 [32.2-33.0] |
|                                               | Two doses                          | 11456 | 12783 | 89.6 [89.1-90.1]   | 97.3 [96.7-97.9]   | 85490 | 109028 | 78.4 [78.2-78.7] | 84.2 [83.9-84.5] |
|                                               | Unvaccinated                       | 5     | 5     | 100.0 [64.9-100.0] | 100.0 [68.4-100.0] | 14    | 20     | 70.0 [48.1-85.5] | 74.3 [48.7-92.4] |
| <b>Shielding out of concern over COVID-19</b> | No                                 | 18714 | 23378 | 80.0 [79.5-80.6]   | 86.1 [85.5-86.7]   | 98112 | 159575 | 61.5 [61.2-61.7] | 64.4 [64.1-64.7] |
|                                               | Yes                                | 1451  | 2050  | 70.8 [68.8-72.7]   | 75.2 [72.9-77.5]   | 11853 | 20758  | 57.1 [56.4-57.8] | 59.2 [58.5-60.0] |
| <b>Comorbidities</b>                          | Organ transplant recipient         | 21    | 30    | 70.0 [52.1-83.3]   | 74.3 [53.4-89.9]   | 128   | 319    | 40.1 [34.9-45.6] | 39.4 [33.3-45.8] |
|                                               | Diabetes (type I or II)            | 1475  | 1837  | 80.3 [78.4-82.0]   | 86.4 [84.2-88.4]   | 8938  | 14318  | 62.4 [61.6-63.2] | 65.5 [64.5-66.4] |
|                                               | Heart disease or heart problems    | 1139  | 1419  | 80.3 [78.1-82.3]   | 86.3 [83.8-88.7]   | 7277  | 11053  | 65.8 [64.9-66.7] | 69.5 [68.4-70.5] |
|                                               | Hypertension (high blood pressure) | 3654  | 4547  | 80.4 [79.2-81.5]   | 86.5 [85.1-87.8]   | 22549 | 35405  | 63.7 [63.2-64.2] | 67.0 [66.4-67.5] |
|                                               | Stroke                             | 218   | 268   | 81.3 [76.2-85.6]   | 87.6 [81.6-92.5]   | 1219  | 1903   | 64.1 [61.9-66.2] | 67.4 [64.8-69.9] |

|  |                                                                  |      |       |                  |                  |       |       |                  |                  |
|--|------------------------------------------------------------------|------|-------|------------------|------------------|-------|-------|------------------|------------------|
|  | Kidney disease                                                   | 137  | 170   | 80.6 [74.0-85.8] | 86.7 [79.0-92.9] | 632   | 1097  | 57.6 [54.7-60.5] | 59.8 [56.4-63.2] |
|  | Liver disease                                                    | 268  | 338   | 79.3 [74.7-83.3] | 85.2 [79.8-89.9] | 1209  | 1942  | 62.3 [60.1-64.4] | 65.3 [62.7-67.8] |
|  | Anemia                                                           | 2150 | 2743  | 78.4 [76.8-79.9] | 84.1 [82.3-85.9] | 9749  | 15049 | 64.8 [64.0-65.5] | 68.2 [67.3-69.1] |
|  | Asthma                                                           | 781  | 1004  | 77.8 [75.1-80.3] | 83.4 [80.3-86.3] | 4521  | 7042  | 64.2 [63.1-65.3] | 67.6 [66.2-68.9] |
|  | Other lung condition                                             | 378  | 485   | 77.9 [74.0-81.4] | 83.6 [79.1-87.7] | 2956  | 4722  | 62.6 [61.2-64.0] | 65.7 [64.1-67.3] |
|  | Cancer                                                           | 219  | 301   | 72.8 [67.5-77.5] | 77.6 [71.4-83.1] | 1457  | 2683  | 54.3 [52.4-56.2] | 56.0 [53.8-58.2] |
|  | Condition affecting the brain and nerves                         | 831  | 1043  | 79.7 [77.1-82.0] | 85.7 [82.7-88.4] | 5037  | 7657  | 65.8 [64.7-66.8] | 69.4 [68.2-70.6] |
|  | A weakened immune system/reduced ability to deal with infections | 1438 | 1898  | 75.8 [73.8-77.6] | 81.1 [78.8-83.3] | 5659  | 10075 | 56.2 [55.2-57.1] | 58.2 [57.0-59.3] |
|  | Depression                                                       | 2051 | 2668  | 76.9 [75.2-78.4] | 82.4 [80.5-84.2] | 8054  | 13386 | 60.2 [59.3-61.0] | 62.8 [61.9-63.8] |
|  | Anxiety                                                          | 301  | 428   | 70.3 [65.8-74.5] | 74.7 [69.5-79.6] | 822   | 1907  | 43.1 [40.9-45.3] | 42.9 [40.3-45.5] |
|  | Psychiatric disorder                                             | 9854 | 12267 | 80.3 [79.6-81.0] | 86.4 [85.6-87.2] | 55423 | 90041 | 61.6 [61.2-61.9] | 64.5 [64.1-64.8] |

**Supplementary table 4**

Odds ratios (95% CIs) for antibody positivity among 68,060 double vaccinated (plus 21 days) participants, for key covariates

| Variable                                      | Category                           | Adjusted on age and sex | Mutually adjusted: on age, sex, ethnicity, previous COVID-19 infection, vaccination status, adiposity, smoking status, shielding status and all comorbidities |
|-----------------------------------------------|------------------------------------|-------------------------|---------------------------------------------------------------------------------------------------------------------------------------------------------------|
| <b>Age group (years)</b>                      | 35-44 (reference)                  | -                       | -                                                                                                                                                             |
|                                               | 18-24                              | 1.1 (0.69,1.75)         | 0.93 (0.56,1.53)                                                                                                                                              |
|                                               | 25-34                              | 1.54 (1.08,2.19)        | 1.63 (1.09,2.44)                                                                                                                                              |
|                                               | 45-54                              | 0.65 (0.51,0.82)        | 0.68 (0.52,0.88)                                                                                                                                              |
|                                               | 55-64                              | 0.47 (0.38,0.57)        | 0.57 (0.45,0.72)                                                                                                                                              |
|                                               | 65-74                              | 0.32 (0.26,0.39)        | 0.44 (0.35,0.55)                                                                                                                                              |
|                                               | 74+                                | 0.3 (0.24,0.37)         | 0.31 (0.24,0.39)                                                                                                                                              |
| <b>Sex</b>                                    | Female (reference)                 | -                       | -                                                                                                                                                             |
|                                               | Male                               | 0.73 (0.7,0.77)         | 0.76 (0.73,0.8)                                                                                                                                               |
| <b>Ethnicity</b>                              | White (reference)                  | -                       | -                                                                                                                                                             |
|                                               | Asian                              | 1.11 (0.98,1.27)        | 1 (0.86,1.16)                                                                                                                                                 |
|                                               | Black                              | 0.9 (0.73,1.11)         | 0.85 (0.66,1.09)                                                                                                                                              |
|                                               | Mixed                              | 1.12 (0.8,1.56)         | 1.21 (0.82,1.78)                                                                                                                                              |
|                                               | Other                              | 1.14 (0.9,1.45)         | 0.94 (0.73,1.22)                                                                                                                                              |
| <b>Prior infection</b>                        | No COVID-19 (reference)            | -                       | -                                                                                                                                                             |
|                                               | COVID-19 suspected or confirmed    | 2.11 (1.92,2.32)        | 2.17 (1.95,2.41)                                                                                                                                              |
| <b>Vaccine type</b>                           | ChAdOx1 (AstraZeneca)              | -                       | -                                                                                                                                                             |
|                                               | BNT162b2 (Pfizer)                  | 1.43 (0.41,4.92)        | 3.61 (3.42,3.81)                                                                                                                                              |
|                                               | Other                              | 3.67 (3.49,3.85)        | 1.29 (0.82,2.03)                                                                                                                                              |
| <b>Adiposity</b>                              | Normal weight (reference)          | -                       | -                                                                                                                                                             |
|                                               | Obese                              | 0.71 (0.66,0.75)        | 0.74 (0.69,0.79)                                                                                                                                              |
|                                               | Overweight                         | 0.86 (0.81,0.91)        | 0.85 (0.8,0.9)                                                                                                                                                |
|                                               | Underweight                        | 0.78 (0.63,0.97)        | 0.88 (0.7,1.11)                                                                                                                                               |
| <b>Smoking</b>                                | Never cigarette smoker (reference) | -                       | -                                                                                                                                                             |
|                                               | Current cigarette smoker           | 0.71 (0.65,0.78)        | 0.73 (0.66,0.81)                                                                                                                                              |
|                                               | Former cigarette smoker            | 0.93 (0.89,0.98)        | 0.95 (0.9,1)                                                                                                                                                  |
|                                               | Prefer not to say                  | 0.81 (0.71,0.94)        | 0.81 (0.66,0.99)                                                                                                                                              |
| <b>Shielding out of concern over COVID-19</b> | No (reference)                     | -                       | -                                                                                                                                                             |
|                                               | Yes                                | 0.63 (0.6,0.67)         | 0.81 (0.75,0.87)                                                                                                                                              |
| <b>Comorbidities</b>                          | Organ transplant recipient         | 0.16 (0.12,0.2)         | 0.23 (0.17,0.31)                                                                                                                                              |
|                                               | Diabetes (type I or II)            | 0.71 (0.66,0.76)        | 0.75 (0.7,0.81)                                                                                                                                               |
|                                               | Heart disease or heart problems    | 1.02 (0.94,1.1)         | 1.12 (1.03,1.22)                                                                                                                                              |

## Supplementary section

|  |                              |                  |                  |
|--|------------------------------|------------------|------------------|
|  | Hypertension                 | 1.02 (0.97,1.07) | 1.12 (1.05,1.18) |
|  | Stroke                       | 0.71 (0.59,0.85) | 0.77 (0.62,0.95) |
|  | Kidney disease               | 0.72 (0.61,0.84) | 0.96 (0.8,1.16)  |
|  | Liver disease                | 0.69 (0.55,0.88) | 1.03 (0.78,1.37) |
|  | Anemia                       | 0.63 (0.54,0.75) | 0.85 (0.7,1.03)  |
|  | Asthma                       | 0.91 (0.84,0.98) | 0.95 (0.88,1.03) |
|  | Other lung condition         | 0.72 (0.67,0.79) | 0.92 (0.83,1.01) |
|  | Cancer                       | 0.68 (0.62,0.75) | 0.77 (0.69,0.86) |
|  | Neurological condition       | 0.62 (0.53,0.72) | 0.75 (0.62,0.89) |
|  | Immunocompromised*           | 0.52 (0.49,0.56) | 0.67 (0.61,0.73) |
|  | Depression                   | 0.74 (0.67,0.81) | 0.83 (0.73,0.94) |
|  | Anxiety                      | 0.93 (0.85,1.01) | 1.13 (1.01,1.26) |
|  | Psychiatric disorder (other) | 0.76 (0.55,1.06) | 1.01 (0.7,1.47)  |

Supplementary figure 1

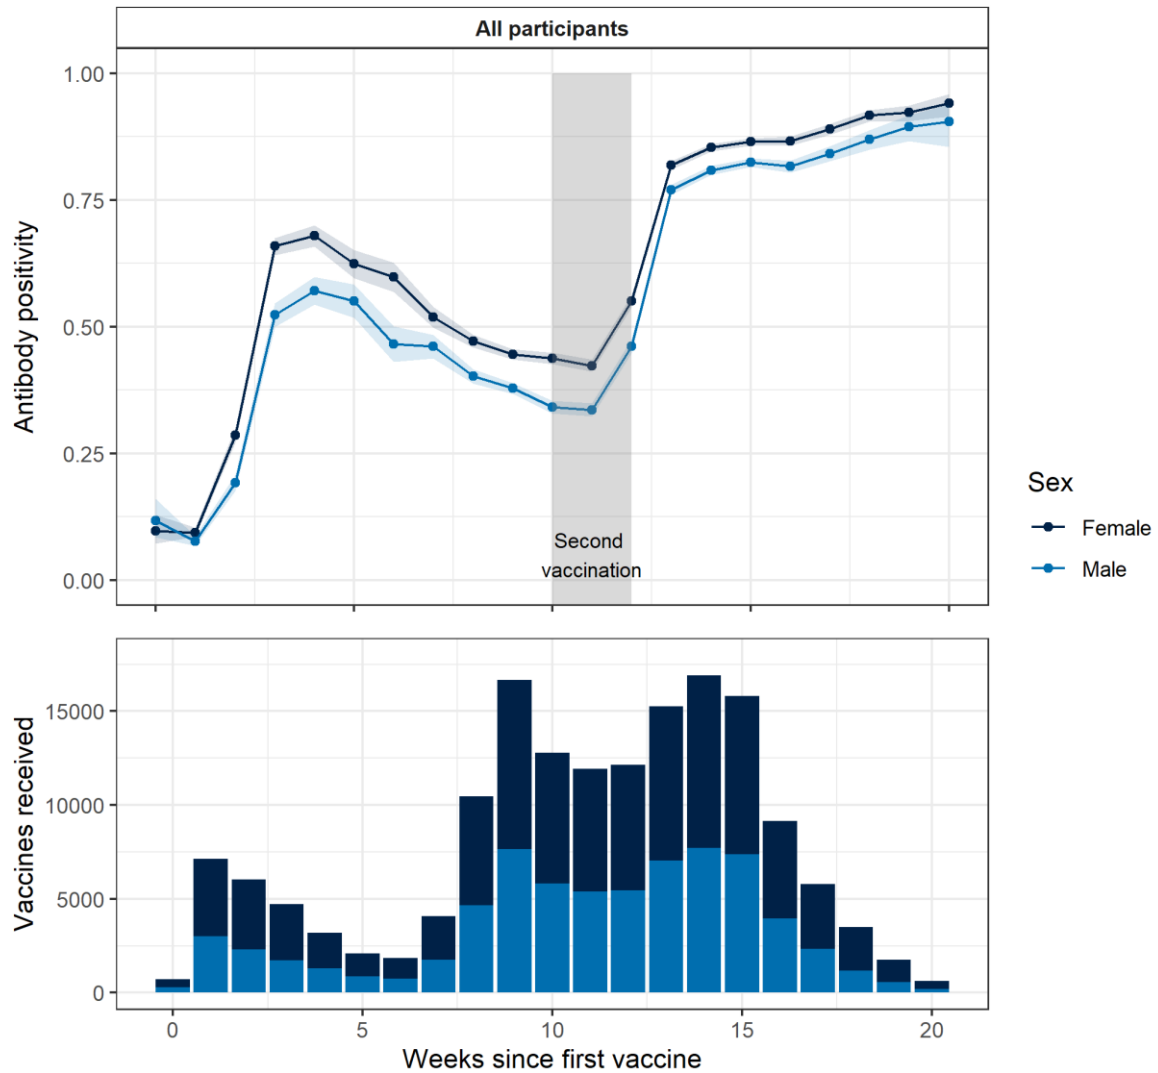

**Supplementary figure 1** Vaccine response (upper panel) and uptake (lower panel) over time, by sex. Participants are grouped by weeks since first and second vaccination, and secondarily by vaccine reported. The proportion of tests reported as positive (antibody positivity) within group by week is shown. Participants who had received either (i) a single dose but no second dose, or (ii) two doses of the vaccine between 10 and 12 weeks after the first were included in the plot. Shaded areas denote 95% confidence intervals. The upward trend post-second-dose observed is attributable to the changing proportions of AZ vs Pfizer vaccine after 17 weeks.



Supplementary figure 2

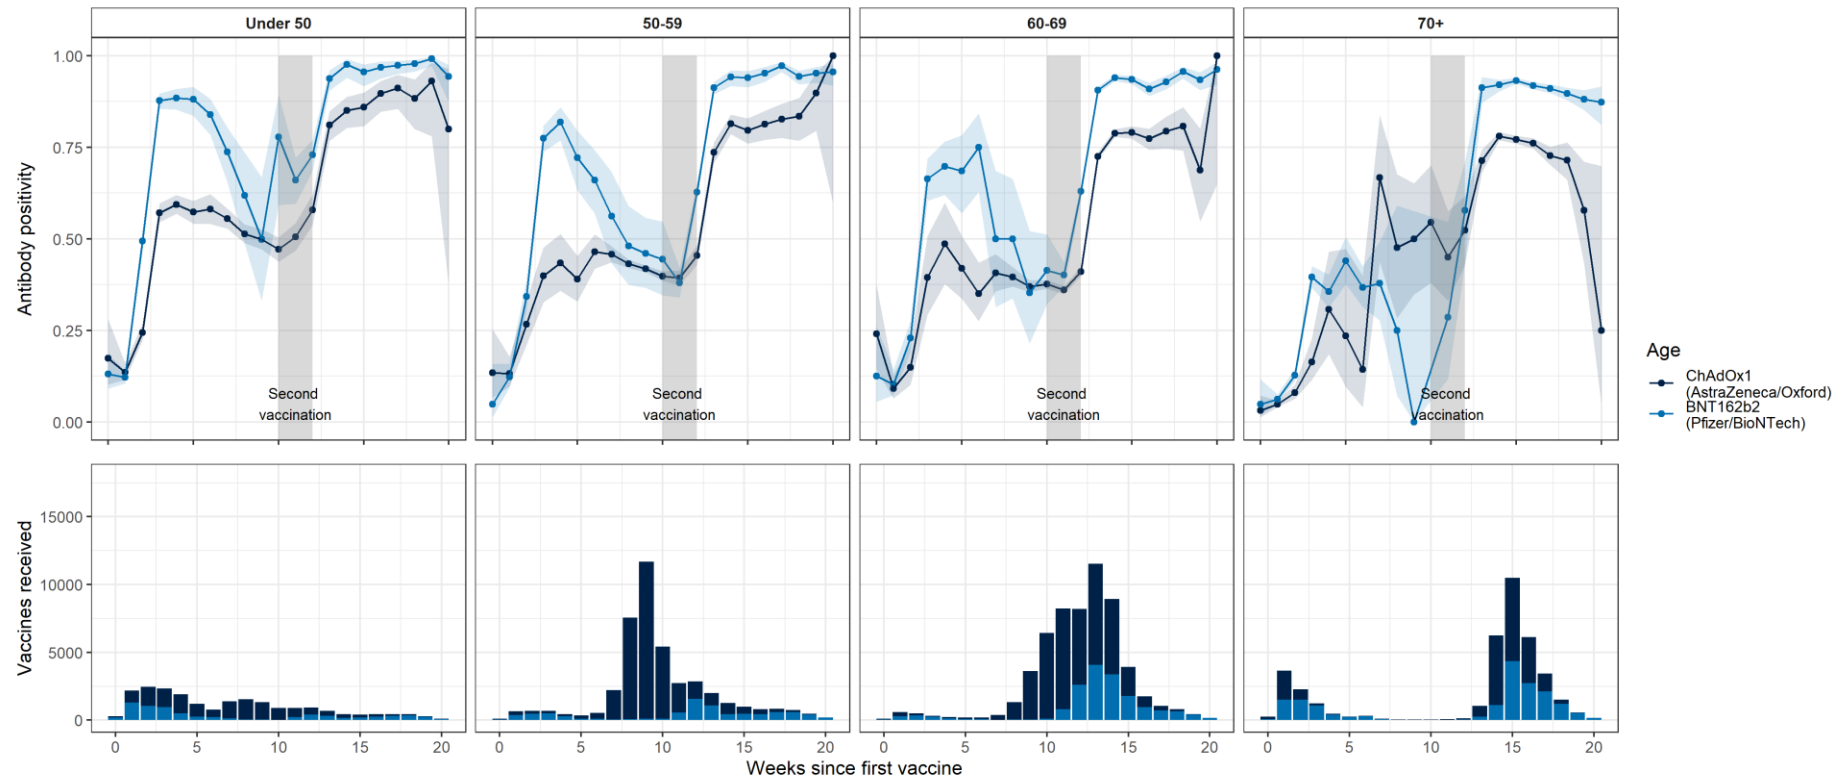

Supplementary figure 2 Vaccine response (upper panel) and uptake (lower panel) over time, by age. Figure specifications are as in Supplementary figure 1.

**Supplementary figure 3**

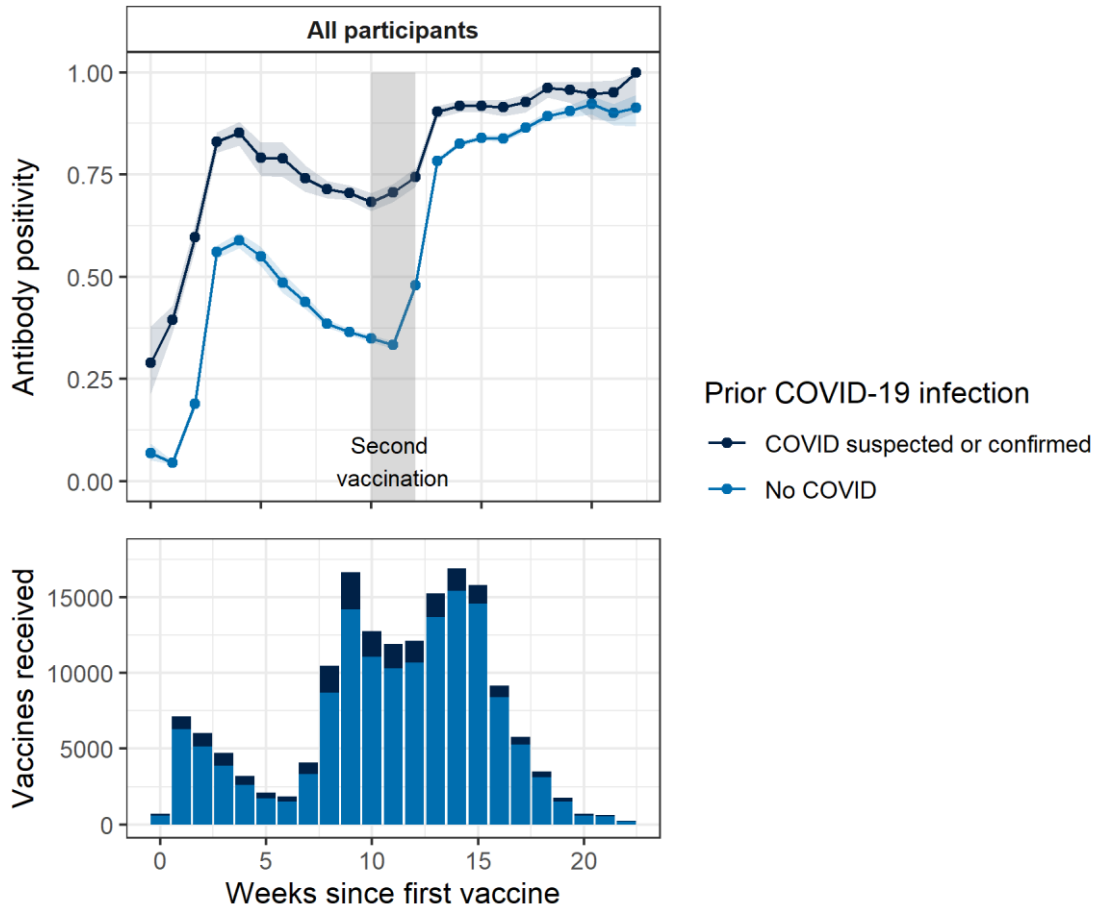

**Supplementary figure 3** Vaccine response (upper panel) and uptake (lower panel) over time, by prior infection status. Figure specifications are as in Supplementary Figure 1.

Supplementary figure 4

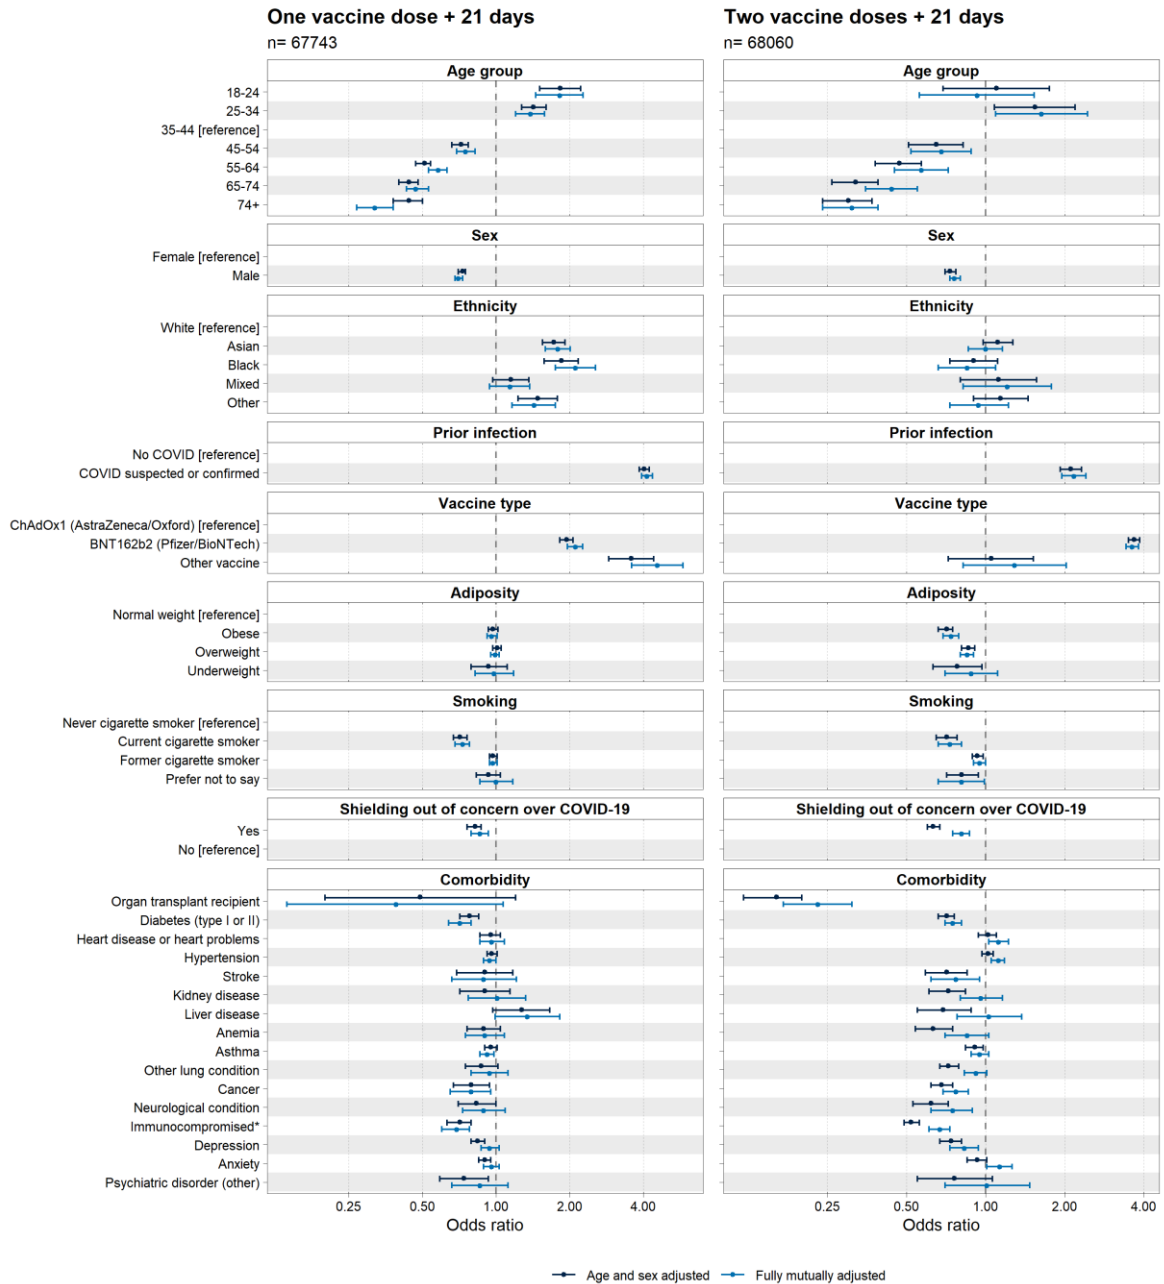

**Supplementary figure 4:** Forest plot showing odds ratios and 95% confidence intervals for antibody positivity (yes/no) versus biological and behavioural covariates in logistic models, among 135,803 respondents who had received (i) one vaccine at least 21 days ago (left panel, n=67,743), and (ii) two vaccine doses with the second dose at least 21 days prior (right panel, n=68,060). Dark blue CIs indicate models adjusted on age and sex only; light blue CIs indicated models adjusted on age, sex, ethnicity, adiposity, vaccine type, prior infection, shielding status, comorbidities and smoking status.

Supplementary figure 5

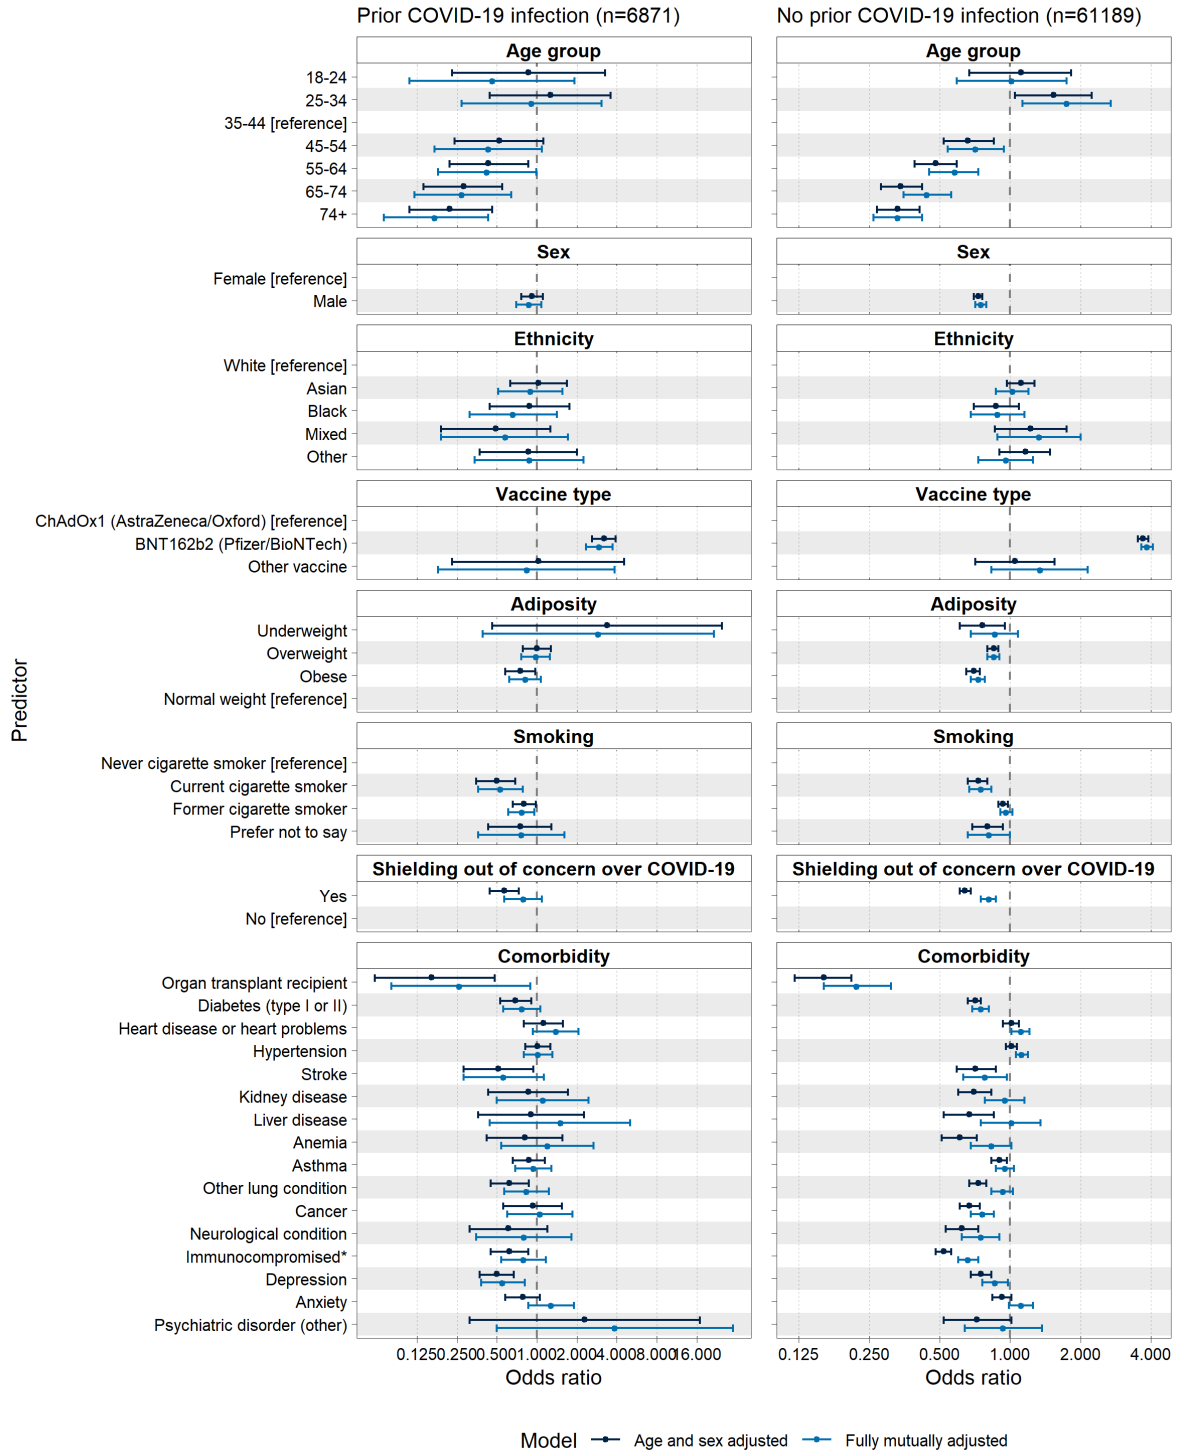

**Supplementary figure 5:** Forest plot showing odds ratios among 68,060 double-vaccinated (+21 days) respondents who reported prior COVID-19 infection (left panel, n=6,871), or no prior COVID-19 infection (right panel, n=61,189). Dark blue CIs indicate models adjusted on age and sex only; light blue CIs indicated models adjusted on age, sex, ethnicity, adiposity, vaccine type, shielding status, comorbidities and smoking status.

Supplementary figure 6

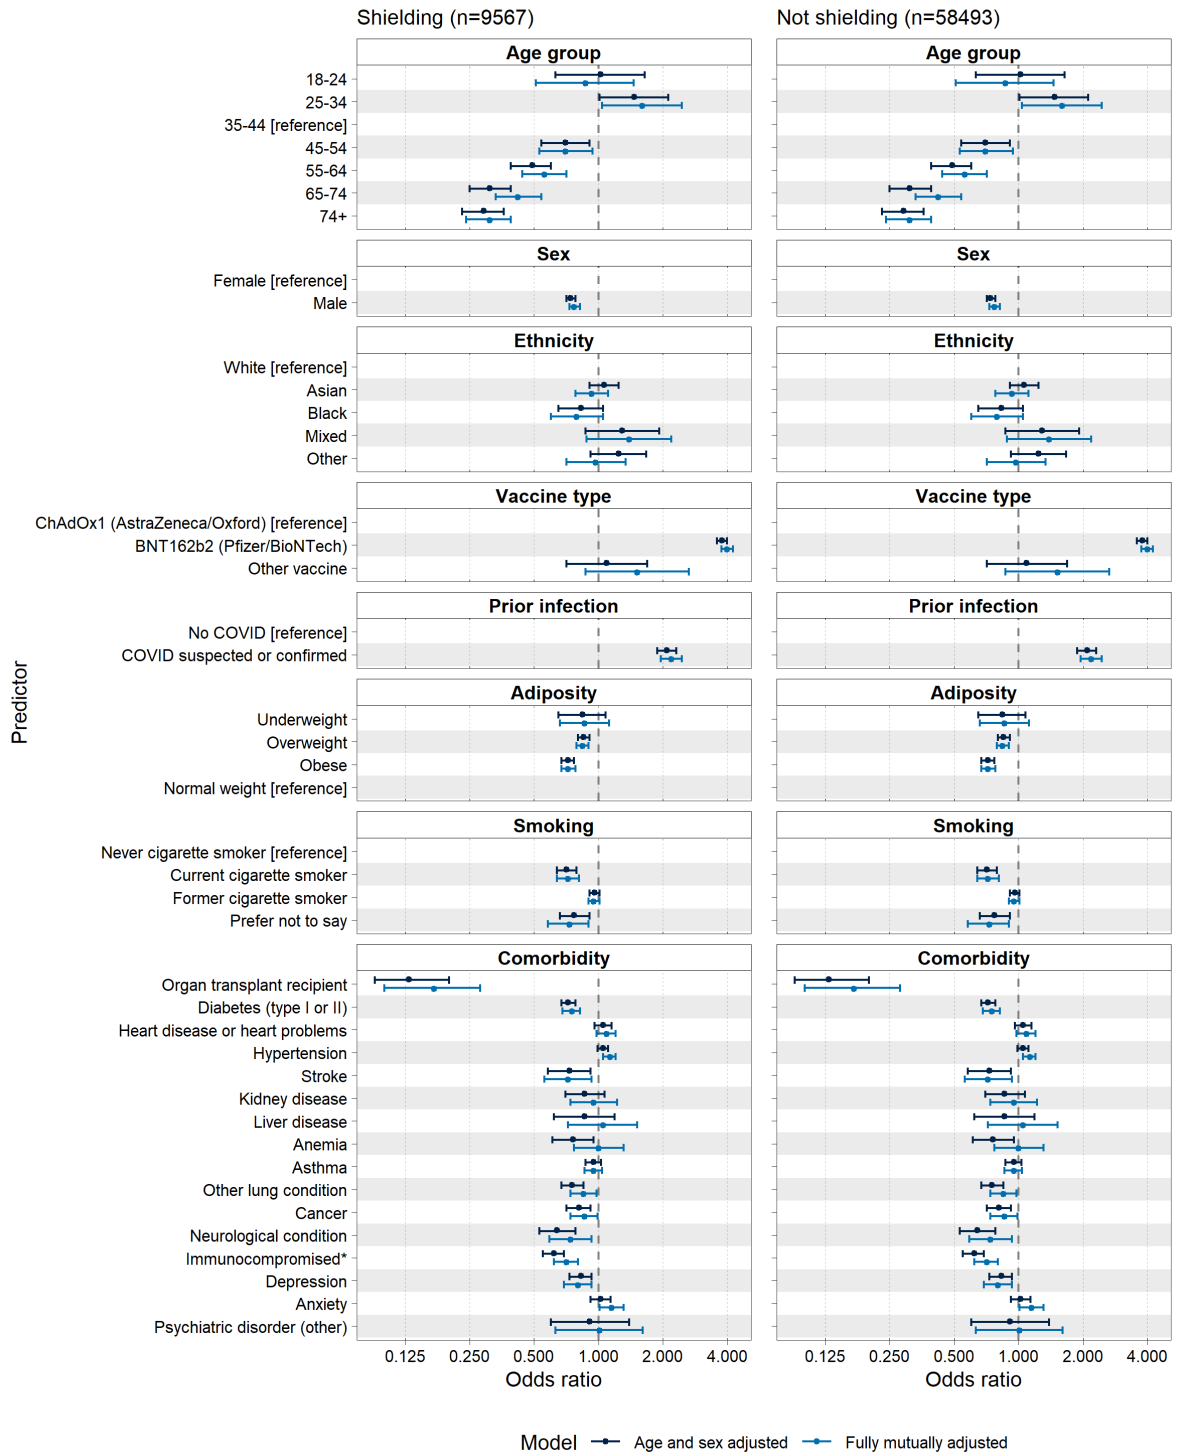

**Supplementary figure 6** Forest plot showing odds ratios among 68,060 double-vaccinated (+21 days) respondents who were shielding (left panel, n=9,567), or not shielding (right panel, n=58,493). Dark blue CIs indicate models adjusted on age and sex only; light blue CIs indicated models adjusted on age, sex, ethnicity, adiposity, vaccine type, past infection, comorbidities and smoking status.

Supplementary figure 7

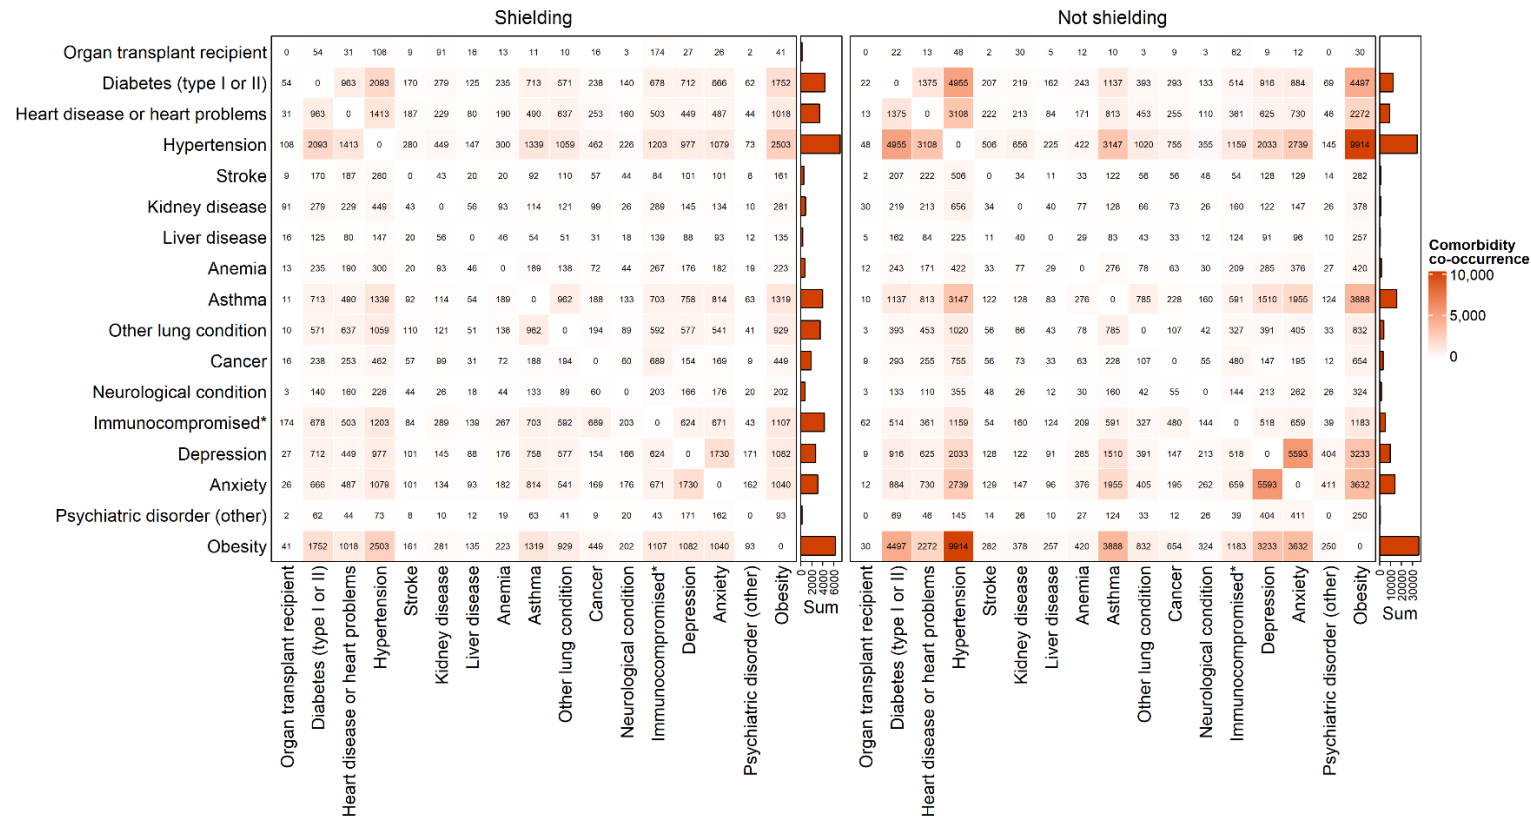

Supplementary figure 7 Heatmap showing co-occurrence of comorbidities in participants who reported that they were shielding (left panel) or not shielding (right panel)

**END OF DOCUMENT**
